# Supplementary material
Source: publisher site journal article supplement (https://static.cambridge.org/content/id/urn:cambridge.org:id:article:S0007114519003222/resource/name/S0007114519003222supp001.docx)
Supplement: Supplementary file 1 [file S0007114519003222supp001.docx]

**Supplementary material**

Table S1. Ingredient and nutrient composition of the rations

| Item | Dietary energy level, MJ/kg DM1 | | | |
| --- | --- | --- | --- | --- |
| 8.21 | 9.33 | 10.45 | 11.57 |
| Ingredient, g/kg dry matter (DM) | | | | |
| Corn | 92.2 | 127.5 | 160.0 | 208.5 |
| Corn starch | 23.5 | 70.0 | 124.0 | 161.5 |
| Sucrose | 5.5 | 16.5 | 22.0 | 30.0 |
| Molasses | 5.5 | 16.5 | 21.5 | 30.0 |
| Wheat bran | 25.0 | 14.6 | 12.8 | 8.0 |
| Soybean meal | 12.0 | 16.5 | 15.4 | 13.2 |
| Cotton seed meal | 15.6 | 13.6 | 13.4 | 12.5 |
| Soybean oil | 0.60 | 4.20 | 10.0 | 15.0 |
| Calcium hydrophosphate | 6.3 | 6.6 | 6.0 | 5.3 |
| Calcium carbonate | 1.8 | 2.0 | 2.9 | 4.0 |
| Sodium chloride | 6.0 | 6.0 | 6.0 | 6.0 |
| Commercial premix2 | 6.0 | 6.0 | 6.0 | 6.0 |
| Highland barley straw | 800 | 700 | 600 | 500 |
| Chemical composition3, g/kg DM | | | | |
| DE, MJ/kg DM | 8.21 | 9.33 | 10.45 | 11.57 |
| CP | 69.7 | 69.6 | 69.1 | 70.2 |
| NDF | 684.1 | 601.5 | 519.7 | 443.7 |
| ADF | 370.2 | 324.9 | 280.9 | 237.6 |
| Ca | 5.21 | 5.13 | 5.20 | 4.92 |
| P | 2.71 | 2.71 | 2.62 | 2.54 |

1 Digestible energy on dry matter basis.

2 The premix provided the following per kg of diets: VA 1700 IU; VD 190 IU; VE 18 IU; Co 0.30mg; Cu 17 mg; I 1.5mg; Fe 70 mg; Mn 38 mg; Se 0.28 mg; Zn 40 mg.

3 The DE were Calculated according to the Feeding Standard of Meat-producing Sheep and Goats of China, NY/T 816-2004 (Ministry of Agriculture, MOA, PRC, 2004). Others were the measured values. DM, dry matter; DE, digestible energy; CP, crude protein; NDF, neutral detergent fibre; ADF, acid detergent fibre; Ca, calcium; P, phosphorus.

Table S2. Sequences of oligonucleotide primers used for qRT-PCR.

| Target gene1 | Gene bank ID | Primer sequences2（5'→3'） | *Tm*3(ºC) |
| --- | --- | --- | --- |
| *FFAR2* | XM_012190178.2 | F: GTGTATGGAGTGATCGCTGCTCTG  R: CTGCTCTTGGCTGAAGTTCTCGTAG | 58 |
| *FFAR3* | XM_015099986.1 | F: CTGTTGCTCTTCCTGCCGTTCC  R: GACGTGAGATAGATGGTGGTGAAGAAG | 58 |
| *MCT1* | AJ315929.1 | F: TGGCTGTCATGTACGGTGGA  R: GCACAGTGTTACAGAAGGAAGCAG | 56.5 |
| *MCT2* | XM_004006510.3 | F: AGAAACGACCTGTAGCGAATGG  R: TGAAACTTCCCTTCCAGCCG | 58 |
| *MCT4* | XM-012186382.1 | F: TGGTGTCTGCGTCCTTCTGTG  R: ATGATGAGTGAGGGCTGGAAGT | 57 |
| *NHE1* | XM-004005085.2 | F: GCCGTCACTGTGGTCCTGTATC  R: ACACCACGAAGAAGCTCAGGAA | 56 |
| *NHE3* | XM-012097233.1 | F: GAAACAGCAGCATTCCCAACG  R: CCGCCACTCATCTCATCATCA | 58 |
| *DRA* | HM010763.1 | F: CGGATTTCTCTTGGAGCCTCTAC  R: CCTTTCGCCACAATCTTCGTAT | 57 |
| *NCB1* | XM_004009897.3 | F: TCTTCTCCCAGCACGACCTCA  R: TCATTGTCACTGTCCAGACTTCCTT | 56 |
| *AE2* | XM_012100091.2 | F: GTGGTGCTGACCCGCATCTT  R: TTATACAGGCATGGGCATCTCA | 56.5 |
| *PAT1* | XM_012100091.2 | F: TCCTCATTATCATCGTCAAACTGG  R: GAGAACACGTCGGTGAACTGC | 57 |
| *vH+-ATPase* | NM_176654.2 | F: GCGGTCACCCGAAACTACATC  R: CAATCTCAGCATACTGGGCAAAC | 58 |
| *Na+/K+-ATPase* | NM-001009360.1 | F: GAGAACGGCTTCCTCCCTAATC  R: CTCTTGCCGAAGGAGGGATTAG | 56.5 |
| *ACAT1* | XM_015100759.1 | F: AGCCAGGTCATACCATCCAGC  R: TGATACATAACTTCGCTCCGCATA | 58 |
| *HMGCS2* | XM_004002390.3 | F: AGGCAACACTGACATTGAAGGC  R: AGTGCGTAGCGACCATCCCA | 58 |
| *PPAR-α* | AY369138.1 | F: TAGAAGATTCCGAAACCGCAGAT  R: GGCGGATTGTTGTTGGTCTTC | 57 |
| *ACAT2* | XM_012127195.1 | F: CATTTGGTTCACTTGAGGACGG  R: TGTGGTAATTGTGGAATGCGTC | 57 |
| *HMGCS1* | XM_015101308.1 | F: CTCTAAACGACGACACTTTGGATG  R: AGGGAGCCTTGGCACTTTCTT | 58 |
| *HMGCR* | XM_004010192.3 | F: AGTCCAGGTCAGGTGATGCCA  R: TCCCTCGTCCCTCTATCCAGTT | 58 |
| *SREBP-2* | AF278694.1 | F: CGAGCAGTGGAGTCCTTGGTA  R: TAATTTCAGGTACTCGAGAGCGC | 57 |
| *β-actin* | U39357.1 | F: AGCCTTCCTTCCTGGGCATGGA  R: GGACAGCACCGTGTTGGCGTAGA | 58 |

1 *ACAT1* and *ACAT2*, Acetoacetyl-CoA acetyl transferase isoform 1 and 2; *AE2*, Anion exchanger 2; *DRA*, downregulated-in-adenoma; *FFAR2* and *FFAR3*, free fatty acid receptor isoform 2 and 3; *HMGCR*, 3-hydroxy, 3-methylglutaryl CoA reductase; *HMGCS1* and *HMGCS2*, 3-hydroxy, 3-methylglutaryl CoA synthase isoform 1 and 2; *MCT1*, *MCT2* and *MCT4*, monocarboxylate cotransporter1 isoform 2 and 4; *Na⁺/K⁺-ATPase*, sodium/potassium ATPase; *NBC1*, Na⁺/HCO3‾ cotransporter 1; *NHE1* and *NHE3*, sodium/hydrogen antiporter isoform 1 and 3; *PAT1*, putative anion transporter 1; *PPAR-α*, peroxisome proliferators-activated receptor α; *SREBP-2*, sterol regulatory element binding protein 2; *νH⁺-ATPase*, vacuolar-type ATPase.

2 F, forward; R, reverse.

3 *Tm*, optimal PCR annealing temperature.

Table S3. The ammonia-N concentration of the rumen fluid in Tibetan (T) and Small-tailed Han (H) sheep offered diets of different energy levels.

| Items | Breed | Dietary energy level, MJ/kg DM1 | | | | SEM | *P*-value2 | | | |
| --- | --- | --- | --- | --- | --- | --- | --- | --- | --- | --- |
| 8.21 | 9.33 | 10.45 | 11.57 | Breed | E-L | E-Q | E-C |
| Ammonia-N mg/100mL | T | 3.06 | 2.71 | 3.15 | 3.81 | 0.369 | 0.011 | 0.026 | 0.596 | 0.837 |
|  | H | 1.92 | 2.45 | 2.70 | 2.78 |  |  | 0.958x | 0.177x | 0.775x |

1 Digestible energy on dry matter basis.

2 E-L = Linear effect of dietary energy level; E-Q = Quadratic effect of dietary energy level; E-C = Cubic effect of dietary energy level.

x *P*-value for the interaction of dietary energy level effect with species.

Figure S1.


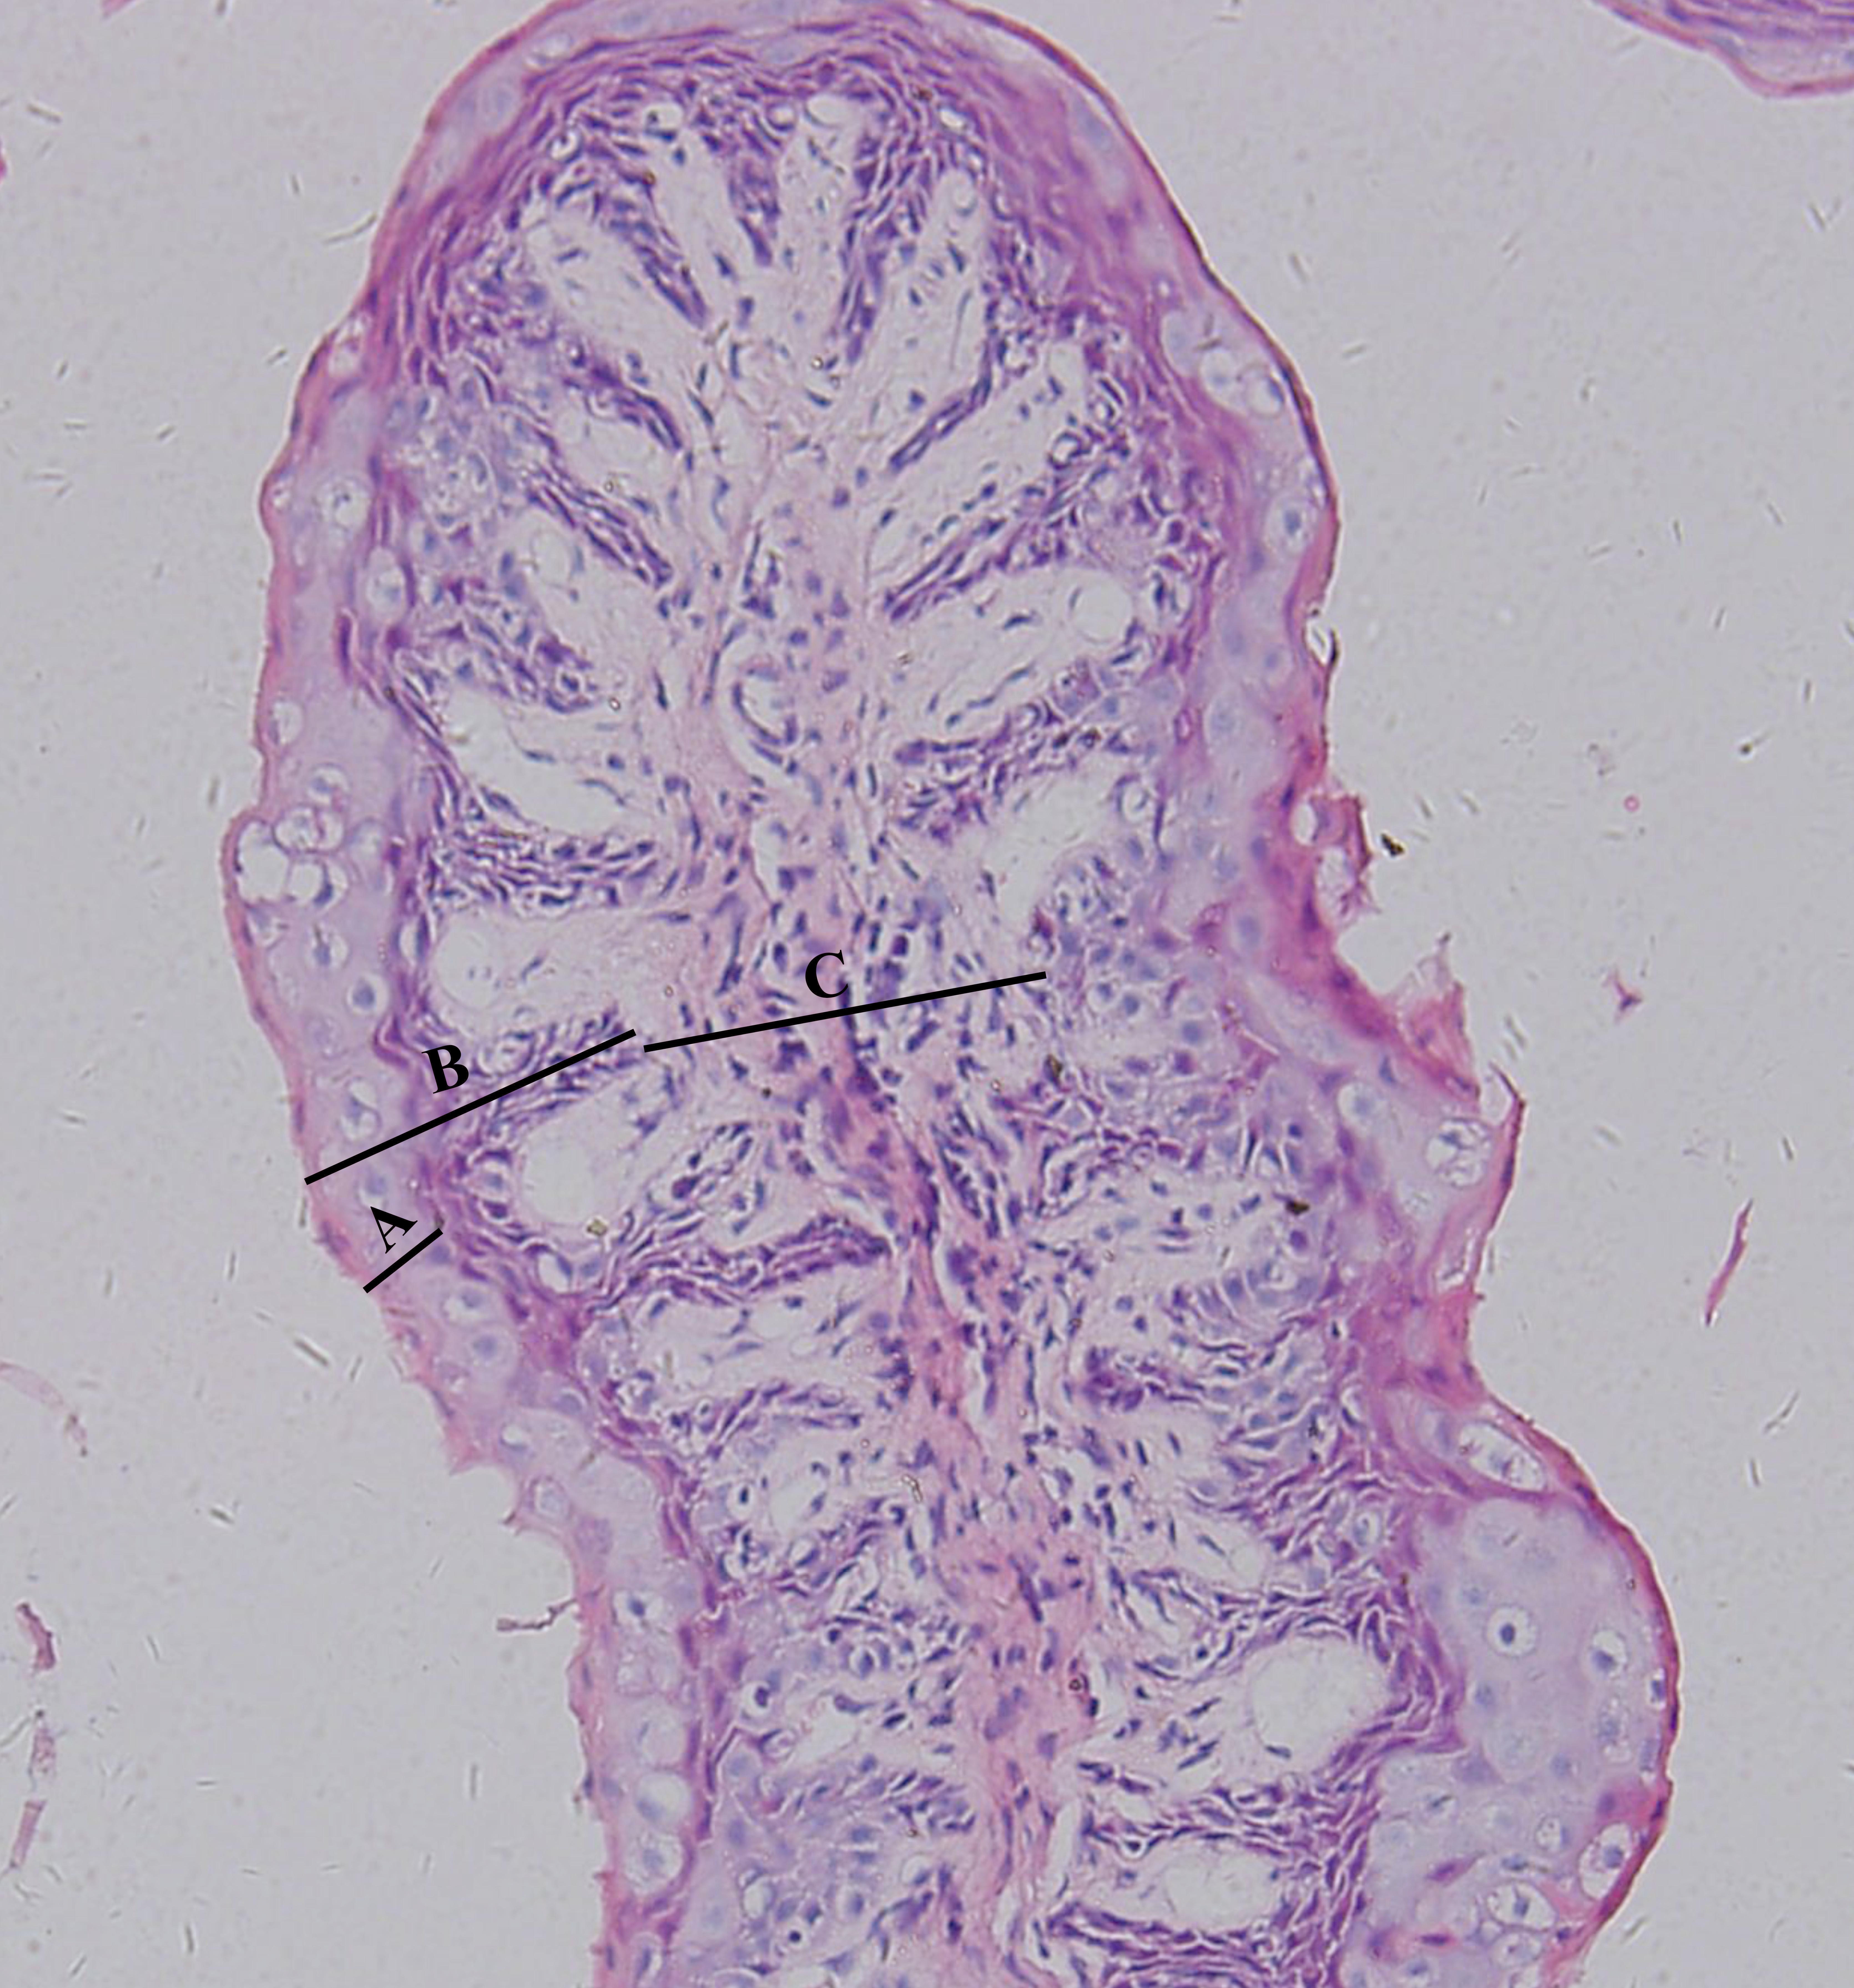


Figure S1. Morphology of ruminal papillae of sheep stained by hematoxylin-eosin under 10x objective. (A) Stratum corneum thickness; (B) Epithelium thinkness; (C) Lamina propria thickness.

Figure S2.


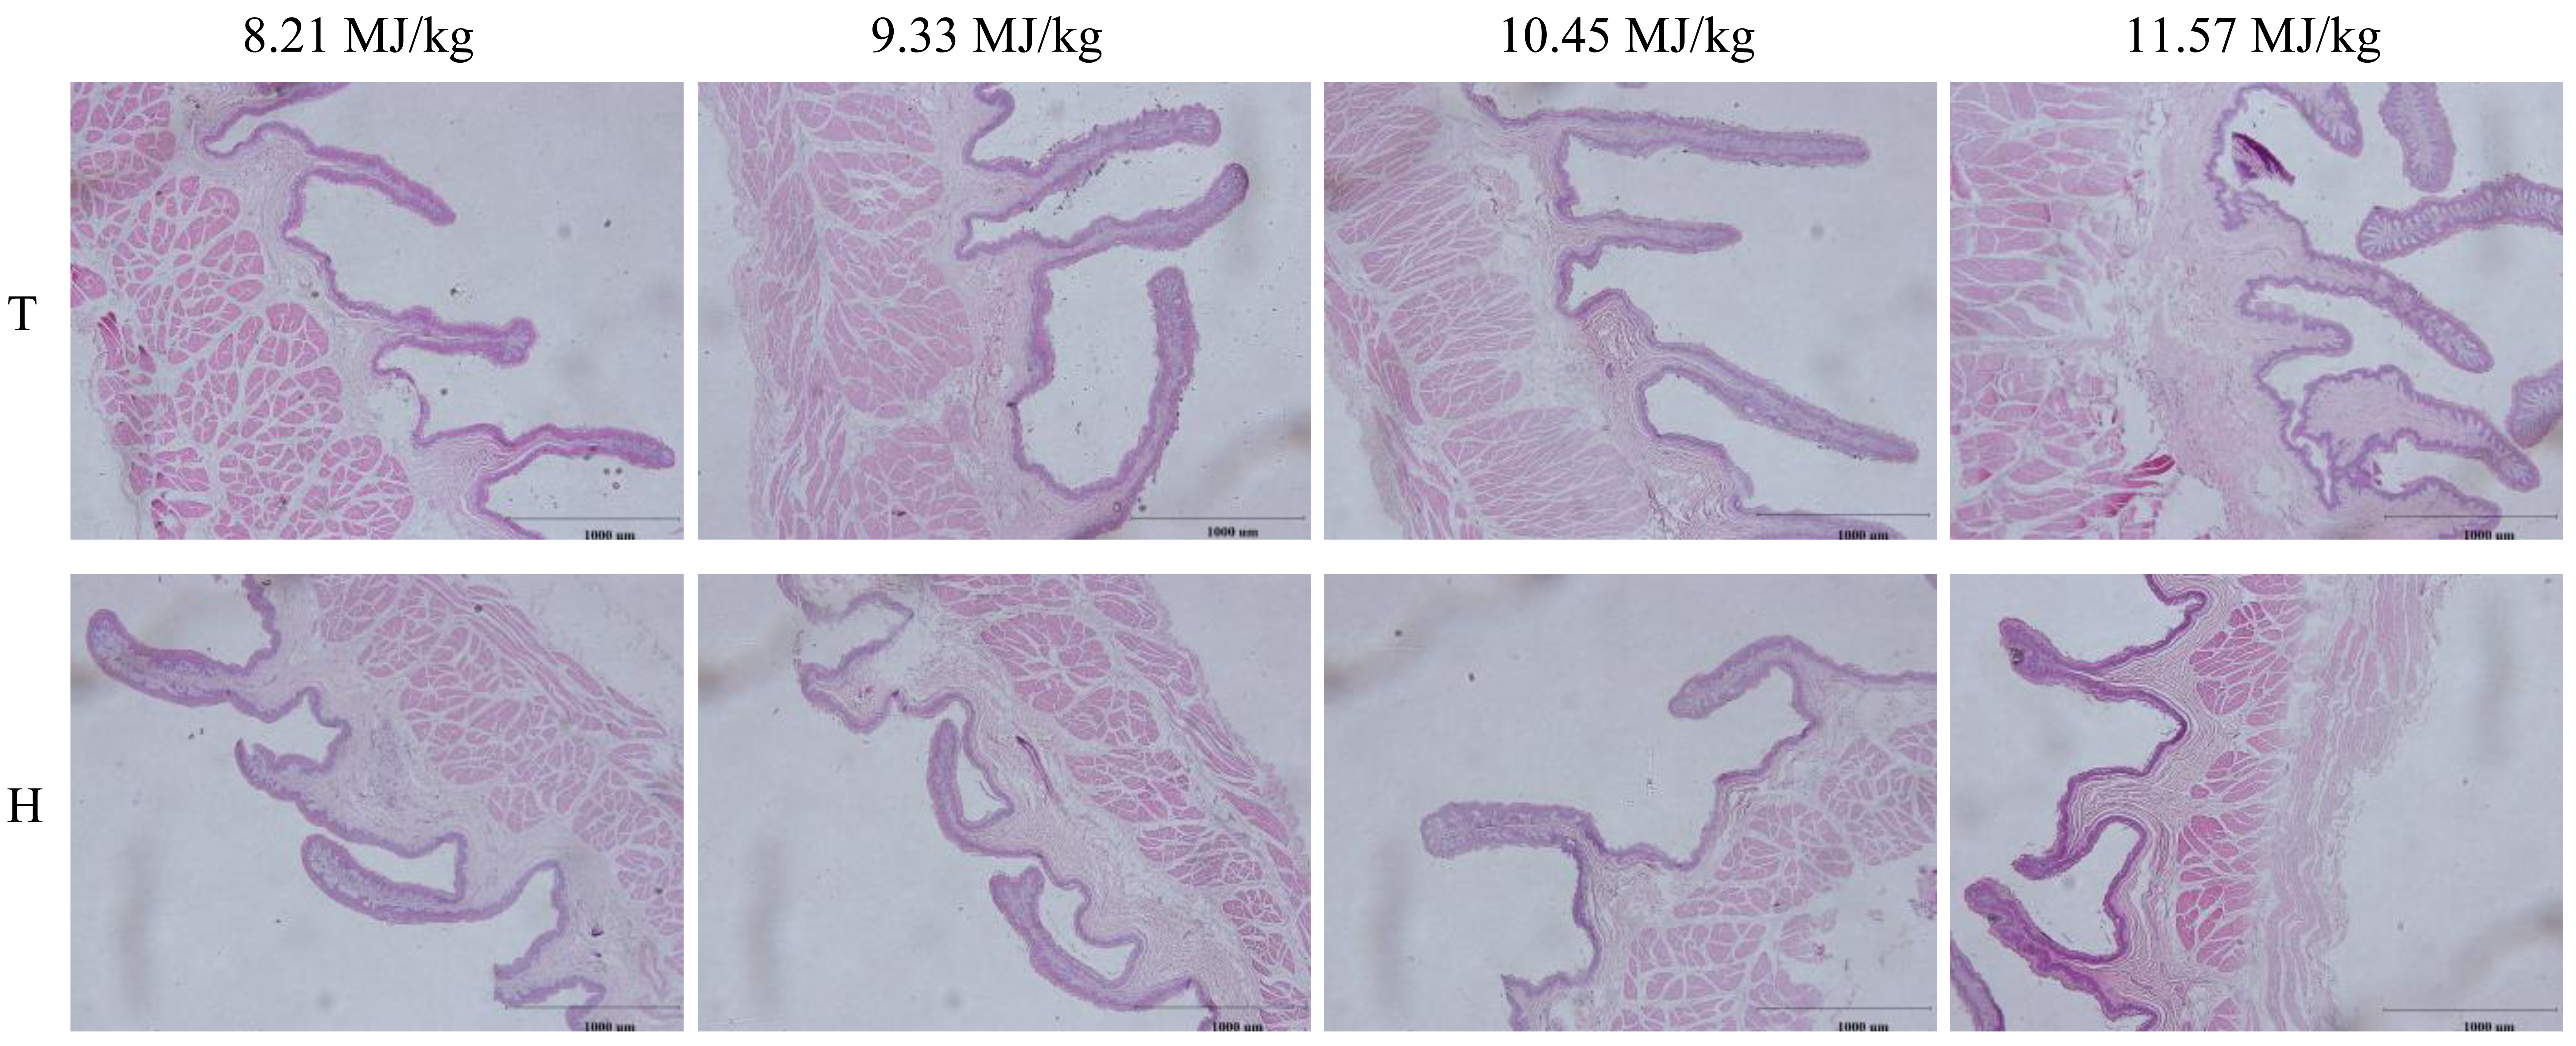


Figure S2. The representative micrographs showing morphological development in the rumen dorsal sac of Tibetan (T) and Small-tailed Han (H) sheep offered diets of different energy levels. The dietary energy levels are digestible energy on dry matter basis. Magnification 40×.

Figure S3.


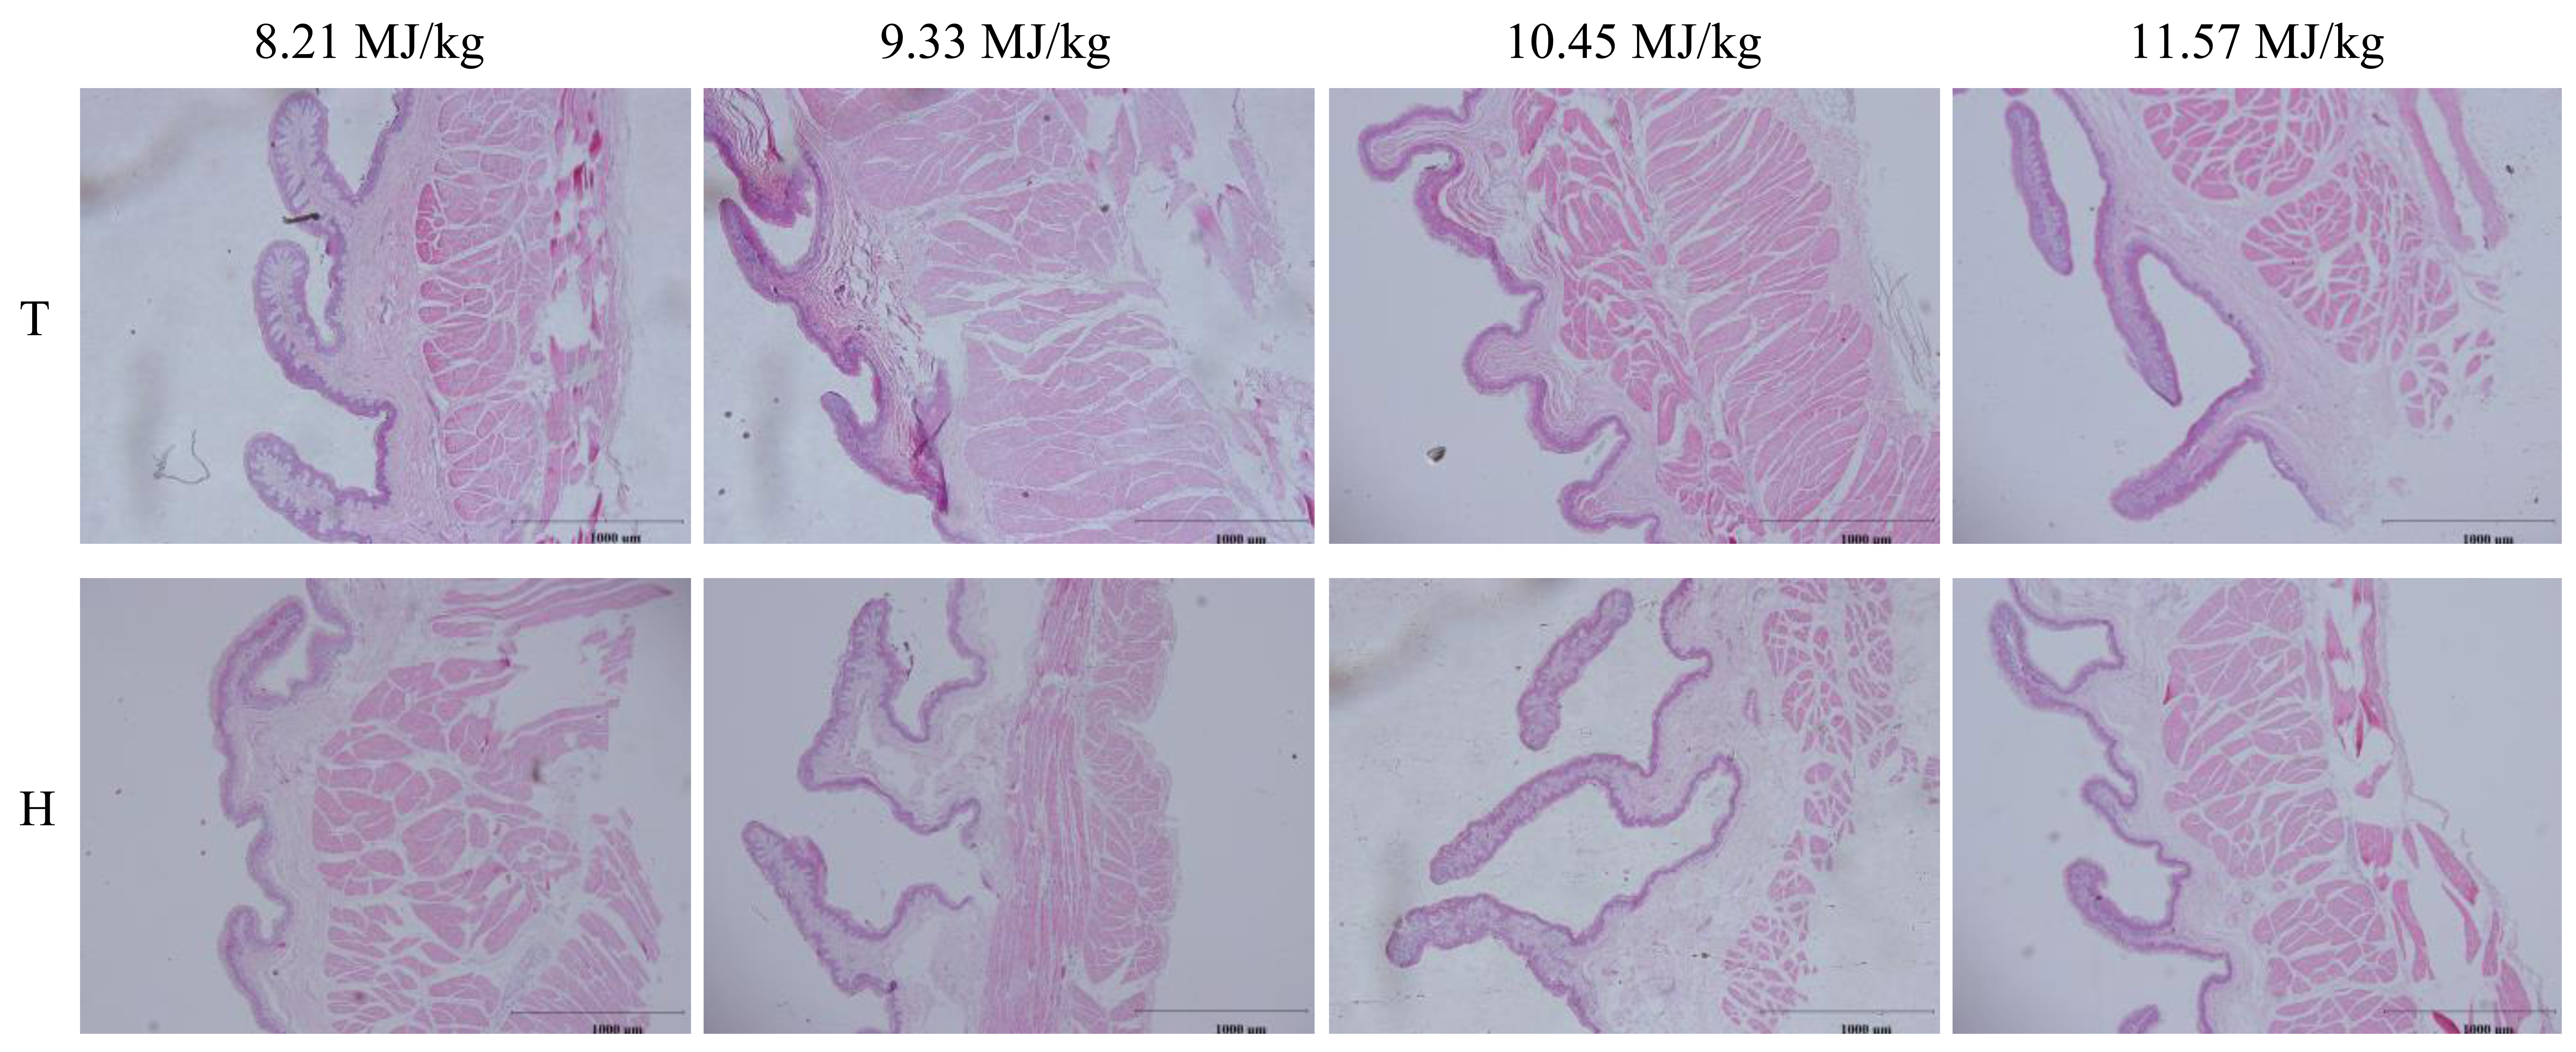


Figure S3. The representative micrographs showing morphological development in the rumen ventral sac of Tibetan (T) and Small-tailed Han (H) sheep offered diets of different energy levels. The dietary energy levels are digestible energy on dry matter basis. Magnification 40×.

Figure S4.


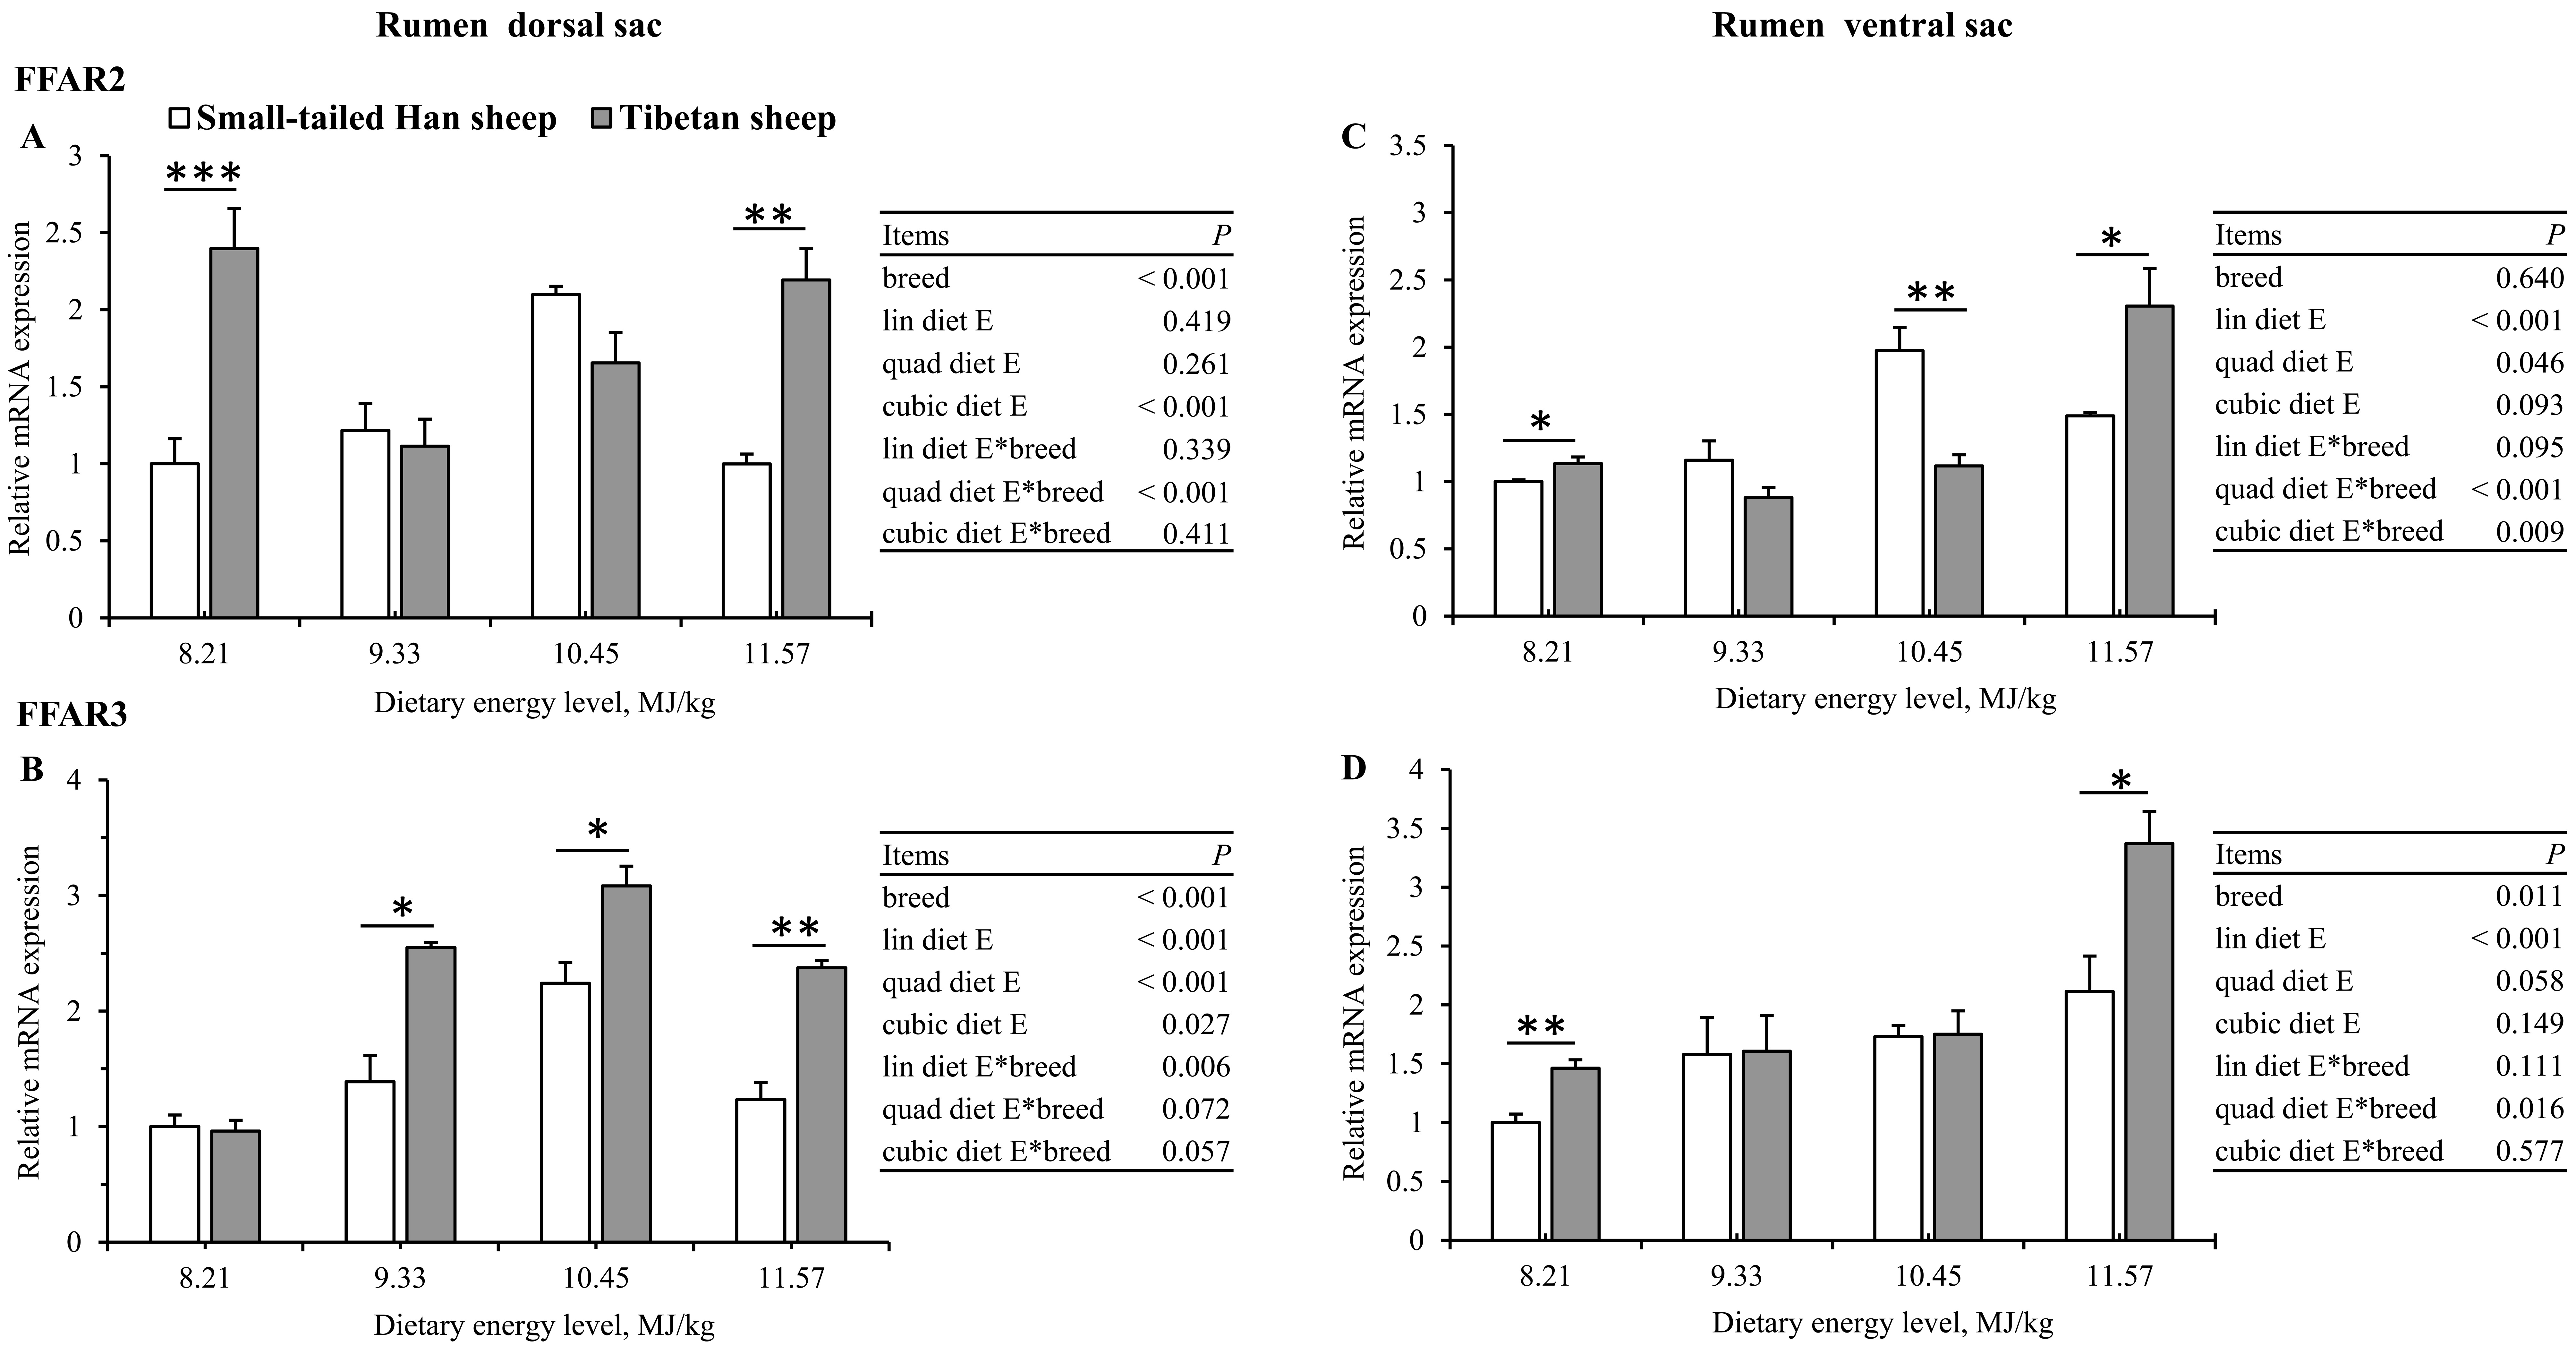


Figure S4. The expression of FFAR2 and FFAR3 mRNA in the rumen epithelium of Tibetan (T) and Small-tailed Han (H) sheep offered diets of different energy levels. FFAR2 and FFAR3, free fatty acid receptor isoform 2 and 3. The dietary energy levels are digestible energy on dry matter basis. * Means *P*< 0.05; ** Means *P*<0.01.
